# Supplementary material for: Development of Caco-2 cells expressing four CYPs via a mammalian artificial chromosome
Source: PubMed Central journal article supplement (PMC7441628; doi:10.1186/s12896-020-00637-8), 2020-08-20
Supplement: 12896_2020_637_MOESM1_ESM.pdf [file 12896_2020_637_MOESM1_ESM.pdf]

## Supplementary material

Title: Development of Caco-2 cells expressing four CYPs via a mammalian artificial chromosome

Yumi Ohta<sup>1</sup>, Kanako Kazuki<sup>2</sup>, Satoshi Abe<sup>3</sup>, Mitsuo Oshimura<sup>3</sup>, Kaoru Kobayashi<sup>4</sup>, Yasuhiro

Kazuki<sup>1,2,\*</sup>

1. Division of Genome and Cellular Functions, Department of Molecular and Cellular Biology,  
School of Life Science, Faculty of Medicine, Tottori University, 86 Nishi-cho, Yonago, Tottori  
683-8503, Japan

2. Chromosome Engineering Research Center (CERC), Tottori University, 86 Nishi-cho, Yonago,  
Tottori 683-8503, Japan

3. Trans Chromosomics, Inc., 86 Nishi-cho, Yonago, Tottori 683-8503, Japan

4. Laboratory of Biopharmaceutics, Meiji Pharmaceutical University, 2-522-1 Noshio, Kiyose,  
Tokyo 204-8588, Japan

\*Correspondence should be addressed to Y.K. (kazuki@tottori-u.ac.jp).

Division of Genome and Cellular Functions, Department of Molecular and Cellular Biology, School  
of Life Science, Faculty of Medicine, Tottori University, 86 Nishi-cho, Yonago, Tottori 683-8503,  
Japan. Tel: +81-859-38-6219. Fax: +81-859-38-6210.

Supplementary Figure

Figure S1. Comparison of gene expression between human small intestine and day 22 culture of Caco-2 and Caco-2 4CYPs-MAC #2.

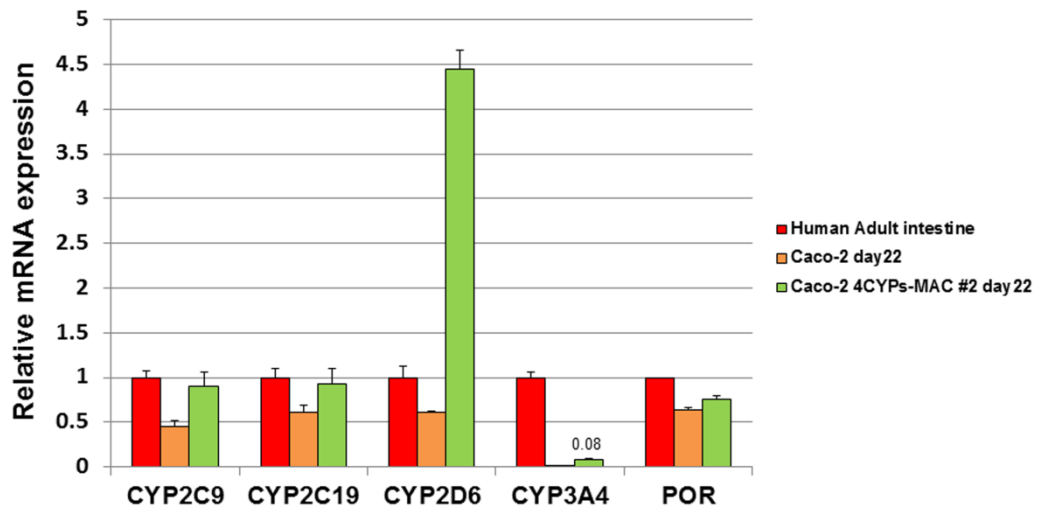

Supplementary Tables

Table S1. Primer sequences for genomic PCR and RT-qPCR

| Aim     | Target gene | Primer name     | Sequence (5'-3')      |
|---------|-------------|-----------------|-----------------------|
| gPCR    | CYP2C9      | gPCR hCYP2C9_F  | ATGGATTCTCTTGTGGTCCT  |
|         |             | gPCR hCYP2C9_R  | TCAGACAGGAATGAAGCACA  |
|         | CYP2C19     | qPCR hCYP2C19_F | ACTTGGAGCTGGGACAGAGA  |
|         |             | CAGpA_rev1764   | CAGCCACCACCTTCTGATAGG |
|         | CYP2D6      | qPCR hCYP2D6_F  | TGATGAGAACCTGCGCATAG  |
|         |             | CAGpA_rev1801   | CTCAGTGGTATTTGTGAGCC  |
|         | CYP3A4      | qPCR hCYP3A4_F  | TGTGGGGCTTTTATGATGGT  |
|         |             | CAGpA_rev1801   | CTCAGTGGTATTTGTGAGCC  |
|         | POR         | qPCR hPOR_F     | TGGAGGAGGACTTCATCACC  |
|         |             | CAGpA_rev1801   | CTCAGTGGTATTTGTGAGCC  |
| RT-qPCR | CYP2C9      | qPCR hCYP2C9_F  | CCACATGCCCTACACAGATG  |
|         |             | qPCR hCYP2C9_R  | TGCCCTTGGGAATGAGATAG  |
|         | CYP2C19     | qPCR hCYP2C19_F | ACTTGGAGCTGGGACAGAGA  |
|         |             | qPCR hCYP2C19_R | CATCTGTGTAGGGCATGTGG  |
|         | CYP2D6      | qPCR hCYP2D6_F  | TGATGAGAACCTGCGCATAG  |
|         |             | qPCR hCYP2D6_R  | CCCTATCACGTCGTCGATCT  |
|         | CYP3A4      | qPCR hCYP3A4_F  | TGTGGGGCTTTTATGATGGT  |
|         |             | qPCR hCYP3A4_R  | CCTCCGGTTTGTGAAGACAG  |
|         | POR         | qPCR hPOR_F     | TGGAGGAGGACTTCATCACC  |
|         |             | qPCR hPOR_R     | ACAAGCTCGTACTGGCGAAT  |
|         | GAPDH       | GAPDH real F    | AGCCACATCGCTCAGACAC   |
|         |             | GAPDH real R    | GCCCAATACGACCAAATCC   |

**Table S2. LC-MS/MS analysis conditions (MDZ, 1'-OH MDZ)**

|                    | HPLC condition                                                                        | MS/MS condition               |       |
|--------------------|---------------------------------------------------------------------------------------|-------------------------------|-------|
| column             | TSK gel ODS-100V column<br>(50 mm x 0.2 mm, 3 $\mu$ m, TOSOH)                         | Ionization method             | ESI+  |
| mobile phase       | A: 0.1% formic acid prepared with MQ<br>B:0.1% formic acid prepared with acetonitrile | curtain gas1                  | 30psi |
| gradient condition | A:B=80:20 (v/v)                                                                       | curtain gas2                  | 40psi |
| flow velocity      | 0.2ml/minute                                                                          | collision gas                 | 9     |
| column temperature | 40°C                                                                                  | Ionspray voltage              | 5500V |
| injection amount   | 10 $\mu$ l                                                                            | Declustering Potential (DP)   | 100V  |
|                    |                                                                                       | Entrance potential            | 10V   |
|                    |                                                                                       | Collision energy              | 40V   |
|                    |                                                                                       | Collision cell exit potential | 10V   |
|                    |                                                                                       | Ion source temp               | 650°C |
